# Supplementary material for: A basis for customising perimetric locations within the macula in glaucoma
Source: PubMed Central journal article supplement — Ophthalmic Physiol Opt. 2018 Jan 8;38(2):164–73. doi: 10.1111/opo.12435 (PMC5887979; doi:10.1111/opo.12435), 2018-01-08
Supplement: OPO-38-164-s001.pdf [file OPO-38-164-s001.pdf]

Name:

DOB:

ID:

Central 24-2 Threshold Test

Fixation Monitor: Gaze/Blind Spot

Stimulus: III, White

Pupil Diameter: 4.9 mm

Date:

Fixation Target: Central

Background: 31.5 ASB

Visual Acuity:

Time:

Fixation Losses: 1/14

Strategy: SITA-Standard

RX: -0.25 DS DC X

Age:

False POS Errors: 0 %

False NEG Errors: 0 %

Test Duration: 04:31

GHT: Outside Normal Limits

Fovea: 37 dB

VFI 97%

MD -0.52 dB

PSD 3.11 dB P < 2%

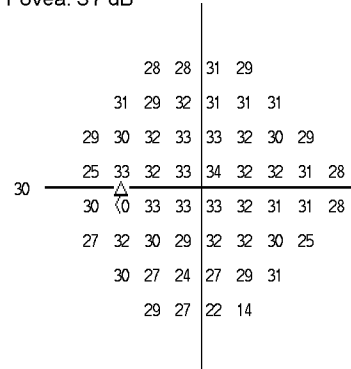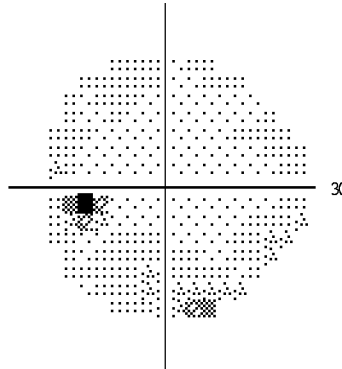

GPA

30-2

No Progression Detected

See GPA printout for complete analysis

- ▲ P < 5% Deterioration
- ▲ P < 5% (2 consecutive)
- ▲ P < 5% (3+ consecutive)
- X Out of Range

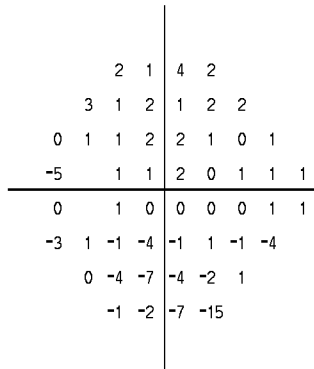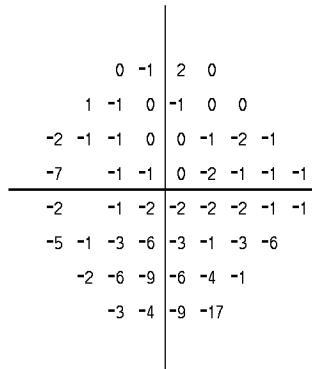

Total Deviation

Pattern Deviation

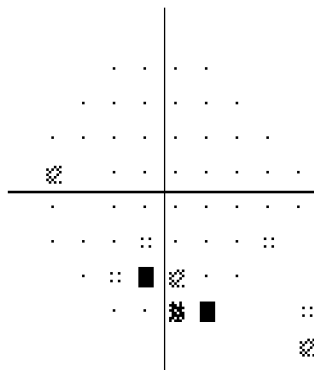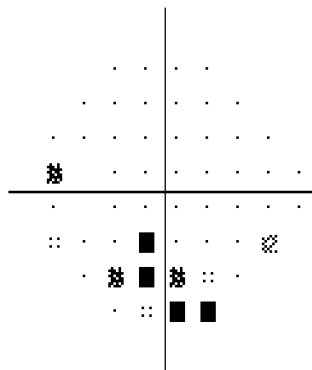

:: < 5%  
 ■ < 2%  
 ■ < 1%  
 ■ < 0.5%

INDIANA UNIVERSITY BCOR  
 800 E ATWATER AVE  
 BLOOMINGTON, IN 47405
