# Supplementary material for: A basis for customising perimetric locations within the macula in glaucoma
Source: PubMed Central journal article supplement — Ophthalmic Physiol Opt. 2018 Jan 8;38(2):164–73. doi: 10.1111/opo.12435 (PMC5887979; doi:10.1111/opo.12435), 2018-01-08

Single Field Analysis

Eye: Right

|       |      |
|-------|------|
| Name: | DOB: |
| ID:   |      |

Central 24-2 Threshold Test

Fixation Monitor: Gaze/Blind Spot  
 Fixation Target: Central  
 Fixation Losses: 2/13  
 False POS Errors: 0 %  
 False NEG Errors: 0 %  
 Test Duration: 04:30

Stimulus: III, White  
 Background: 31.5 ASB  
 Strategy: SITA-Standard

Pupil Diameter: 5.1 mm  
 Visual Acuity:  
 RX: -1.50 DS DC X

Date:  
 Time:  
 Age:

Fovea: 36 dB

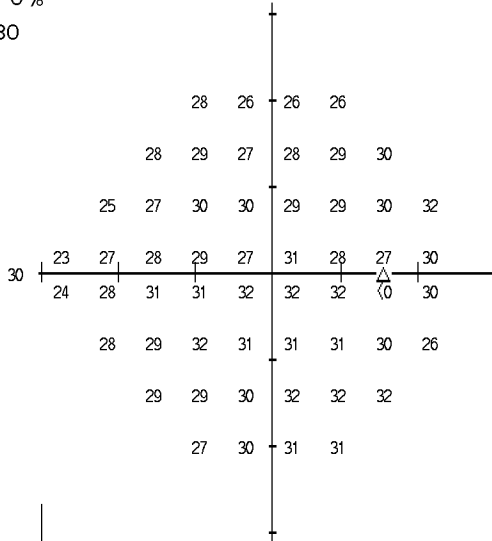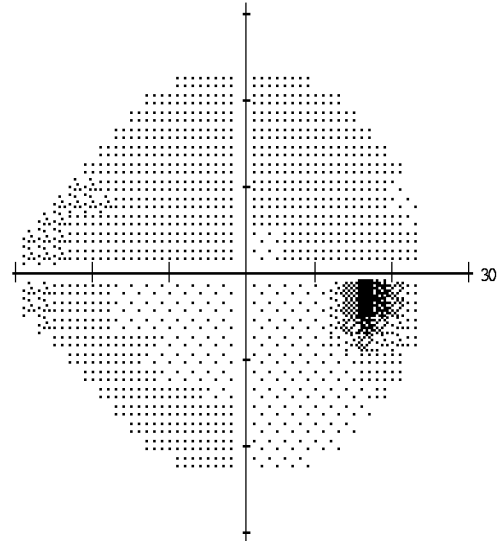

|    |    |    |              |
|----|----|----|--------------|
| 2  | 0  | 0  | 0            |
| 0  | 0  | -2 | -1 1 3       |
| -3 | -3 | -1 | -1 -1 1 4    |
| -3 | -2 | -3 | -3 -5 0 -3 1 |
| -3 | -1 | 0  | -1 0 0 1 1   |
| 0  | -2 | 0  | -1 0 0 0 -3  |
| 0  | -1 | -1 | 1 2 2        |
| -1 | 1  | 2  | 2            |

|    |    |    |                |
|----|----|----|----------------|
| 0  | -2 | -2 | -2             |
| -2 | -2 | -4 | -2 -1 1        |
| -4 | -4 | -2 | -3 -3 -2 -1 2  |
| -5 | -3 | -4 | -4 -7 -2 -4 0  |
| -4 | -2 | -2 | -3 -2 -2 0 -1  |
| -2 | -3 | -1 | -3 -2 -1 -2 -5 |
| -2 | -2 | -3 | 0 0 1          |
| -3 | -1 | 0  | 0              |

GHT  
 Outside Normal Limits  
 VFI 98%  
 MD -0.62 dB  
 PSD 1.80 dB P < 10%

Total Deviation

Pattern Deviation

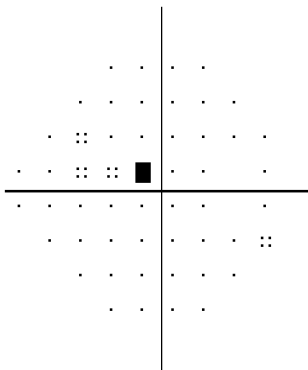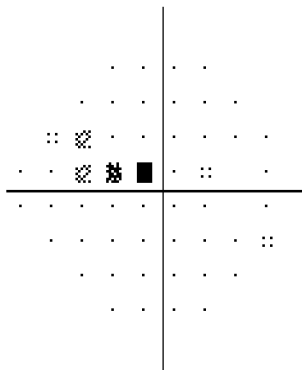

:: < 5%  
 ☒ < 2%  
 ■ < 1%  
 ■ < 0.5%

INDIANA UNIVERSITY BCOR  
 800 E ATWATER AVE  
 BLOOMINGTON, IN 47405

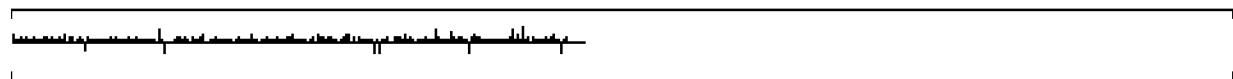

Supplement: OPO-38-164-s003.pdf [file OPO-38-164-s003.pdf]
