# Supplementary material for: A basis for customising perimetric locations within the macula in glaucoma
Source: PubMed Central journal article supplement — Ophthalmic Physiol Opt. 2018 Jan 8;38(2):164–73. doi: 10.1111/opo.12435 (PMC5887979; doi:10.1111/opo.12435), 2018-01-08
Supplement: OPO-38-164-s004.pdf [file OPO-38-164-s004.pdf]

Single Field Analysis

Eye: Left

Name:

DOB:

ID:

Central 24-2 Threshold Test

Fixation Monitor: Blind Spot

Stimulus: III, White

Pupil Diameter: 3.7 mm

Date:

Fixation Target: Central

Background: 31.5 ASB

Visual Acuity:

Time:

Fixation Losses: 0/14

Strategy: SITA-Standard

RX: +1.00 DS DC X

Age:

False POS Errors: 4 %

False NEG Errors: 5 %

Test Duration: 05:20

Fovea: 31 dB

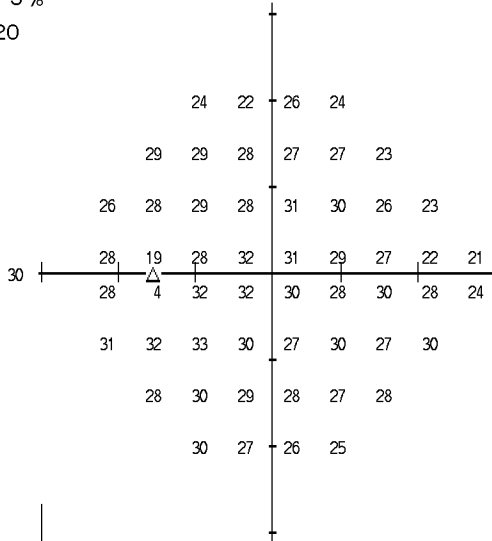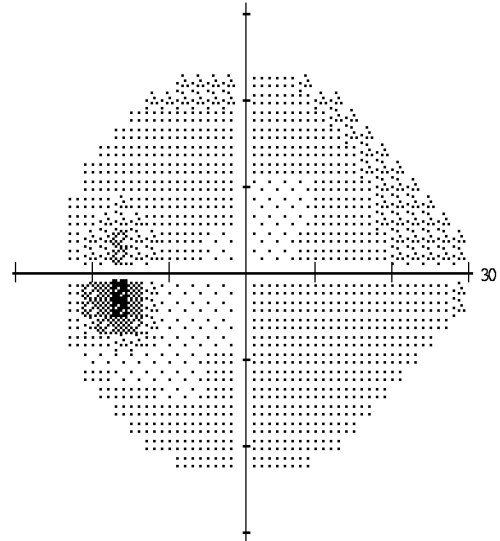

|    |    |    |    |    |    |    |    |
|----|----|----|----|----|----|----|----|
| -2 | -4 | -1 | -2 |    |    |    |    |
| 2  | 1  | 0  | -2 | -1 | -5 |    |    |
| -2 | -1 | 0  | -2 | 0  | 0  | -4 | -5 |
| -1 | -3 | 0  | -1 | -3 | -3 | -7 | -5 |
| -1 | 1  | 0  | -2 | -4 | -1 | -1 | -2 |
| 2  | 2  | 2  | -2 | -4 | -1 | -3 | 1  |
| -1 | 0  | -2 | -3 | -4 | -1 |    |    |
| 1  | -2 | -3 | -3 |    |    |    |    |

|    |    |    |    |    |    |    |    |
|----|----|----|----|----|----|----|----|
| -2 | -4 | -1 | -3 |    |    |    |    |
| 1  | 0  | -1 | -3 | -2 | -5 |    |    |
| -3 | -1 | -1 | -3 | -1 | -1 | -5 | -6 |
| -1 | -3 | 0  | -1 | -3 | -4 | -8 | -5 |
| -2 | 0  | -1 | -3 | -5 | -1 | -2 | -2 |
| 1  | 1  | 1  | -2 | -5 | -1 | -4 | 1  |
| -2 | -1 | -2 | -3 | -4 | -1 |    |    |
| 0  | -3 | -4 | -4 |    |    |    |    |

GHT

Borderline

VFI 97%

MD -1.60 dB

PSD 2.03 dB P < 5%

Total Deviation

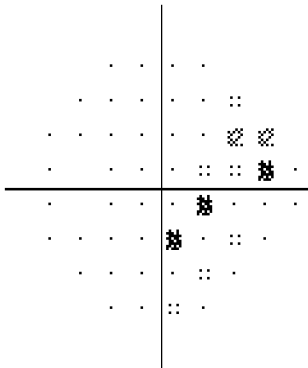

Pattern Deviation

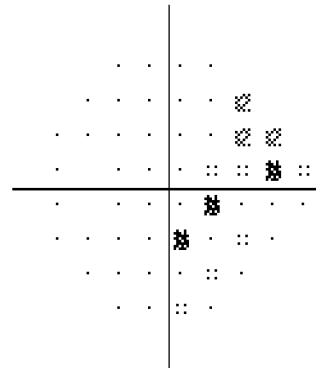

- :: < 5%
- ⊗ < 2%
- ⊗ < 1%
- < 0.5%

INDIANA UNIVERSITY BCOR  
800 E ATWATER AVE  
BLOOMINGTON, IN 47405
