# Supplementary material for: A basis for customising perimetric locations within the macula in glaucoma
Source: PubMed Central journal article supplement — Ophthalmic Physiol Opt. 2018 Jan 8;38(2):164–73. doi: 10.1111/opo.12435 (PMC5887979; doi:10.1111/opo.12435), 2018-01-08

Central 24-2 Threshold Test

Fixation Monitor: Gaze/Blind Spot

Stimulus: III, White

Pupil Diameter: 6.3 mm

Date:

Fixation Target: Central

Background: 31.5 ASB

Visual Acuity:

Time:

Fixation Losses: 0/15

Strategy: SITA-Standard

RX: -0.50 DS DC X

Age:

False POS Errors: 1 %

False NEG Errors: 0 %

Test Duration: 05:40

GHT: Outside Normal Limits

Fovea: 34 dB

VFI 90%

MD -4.63 dB P < 0.5%

PSD 5.46 dB P < 0.5%

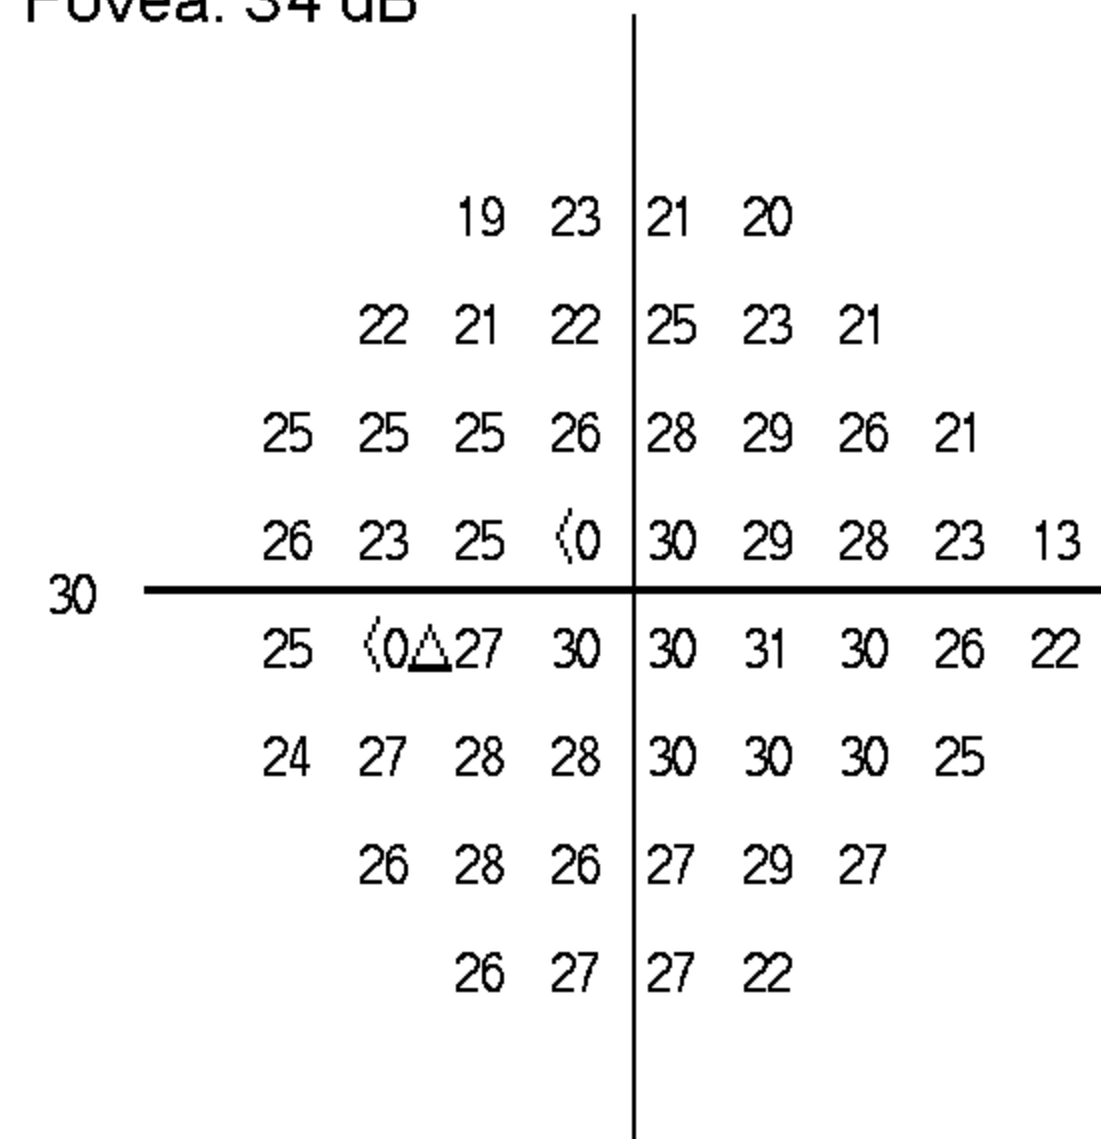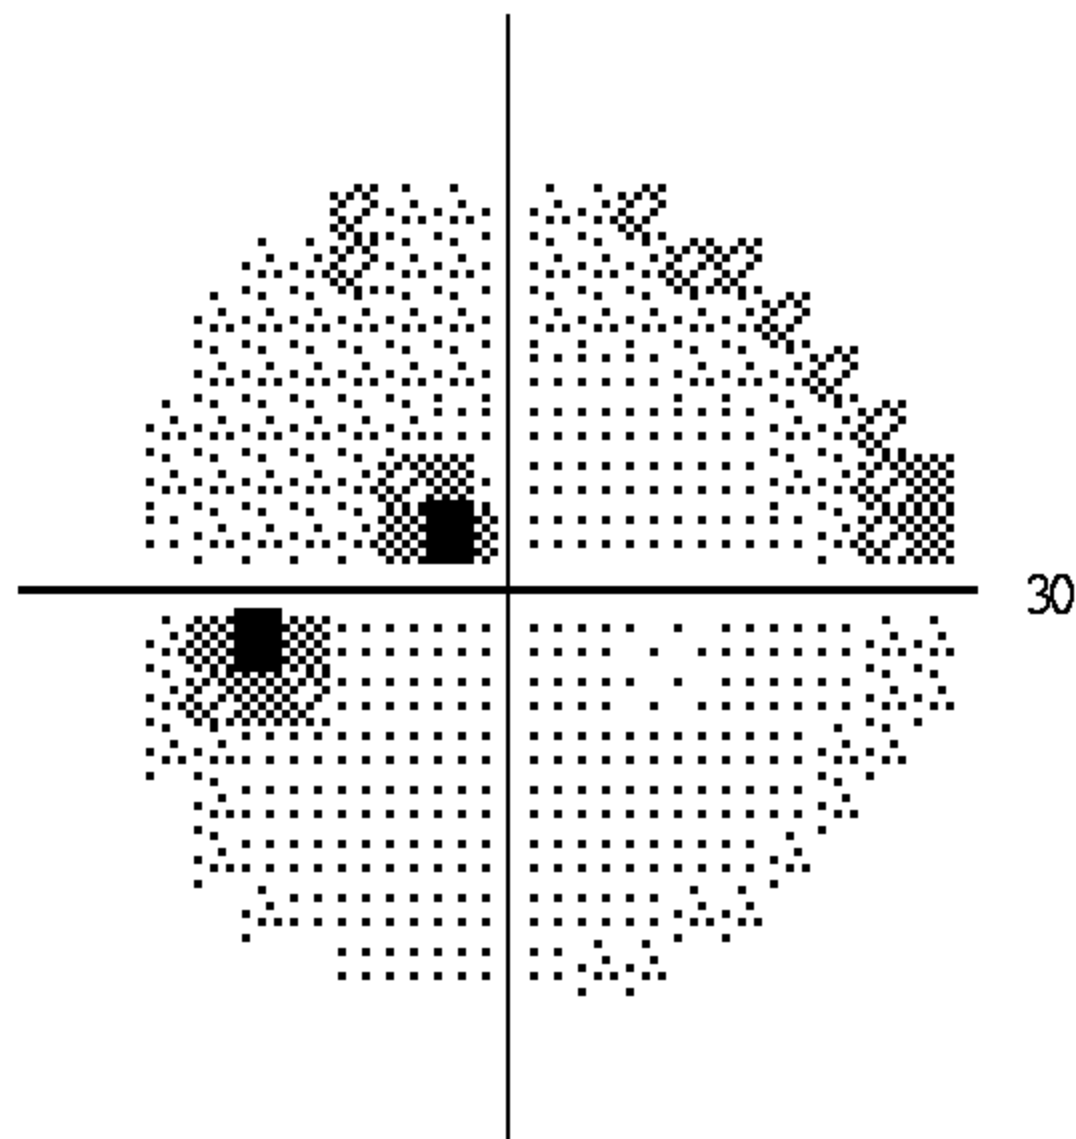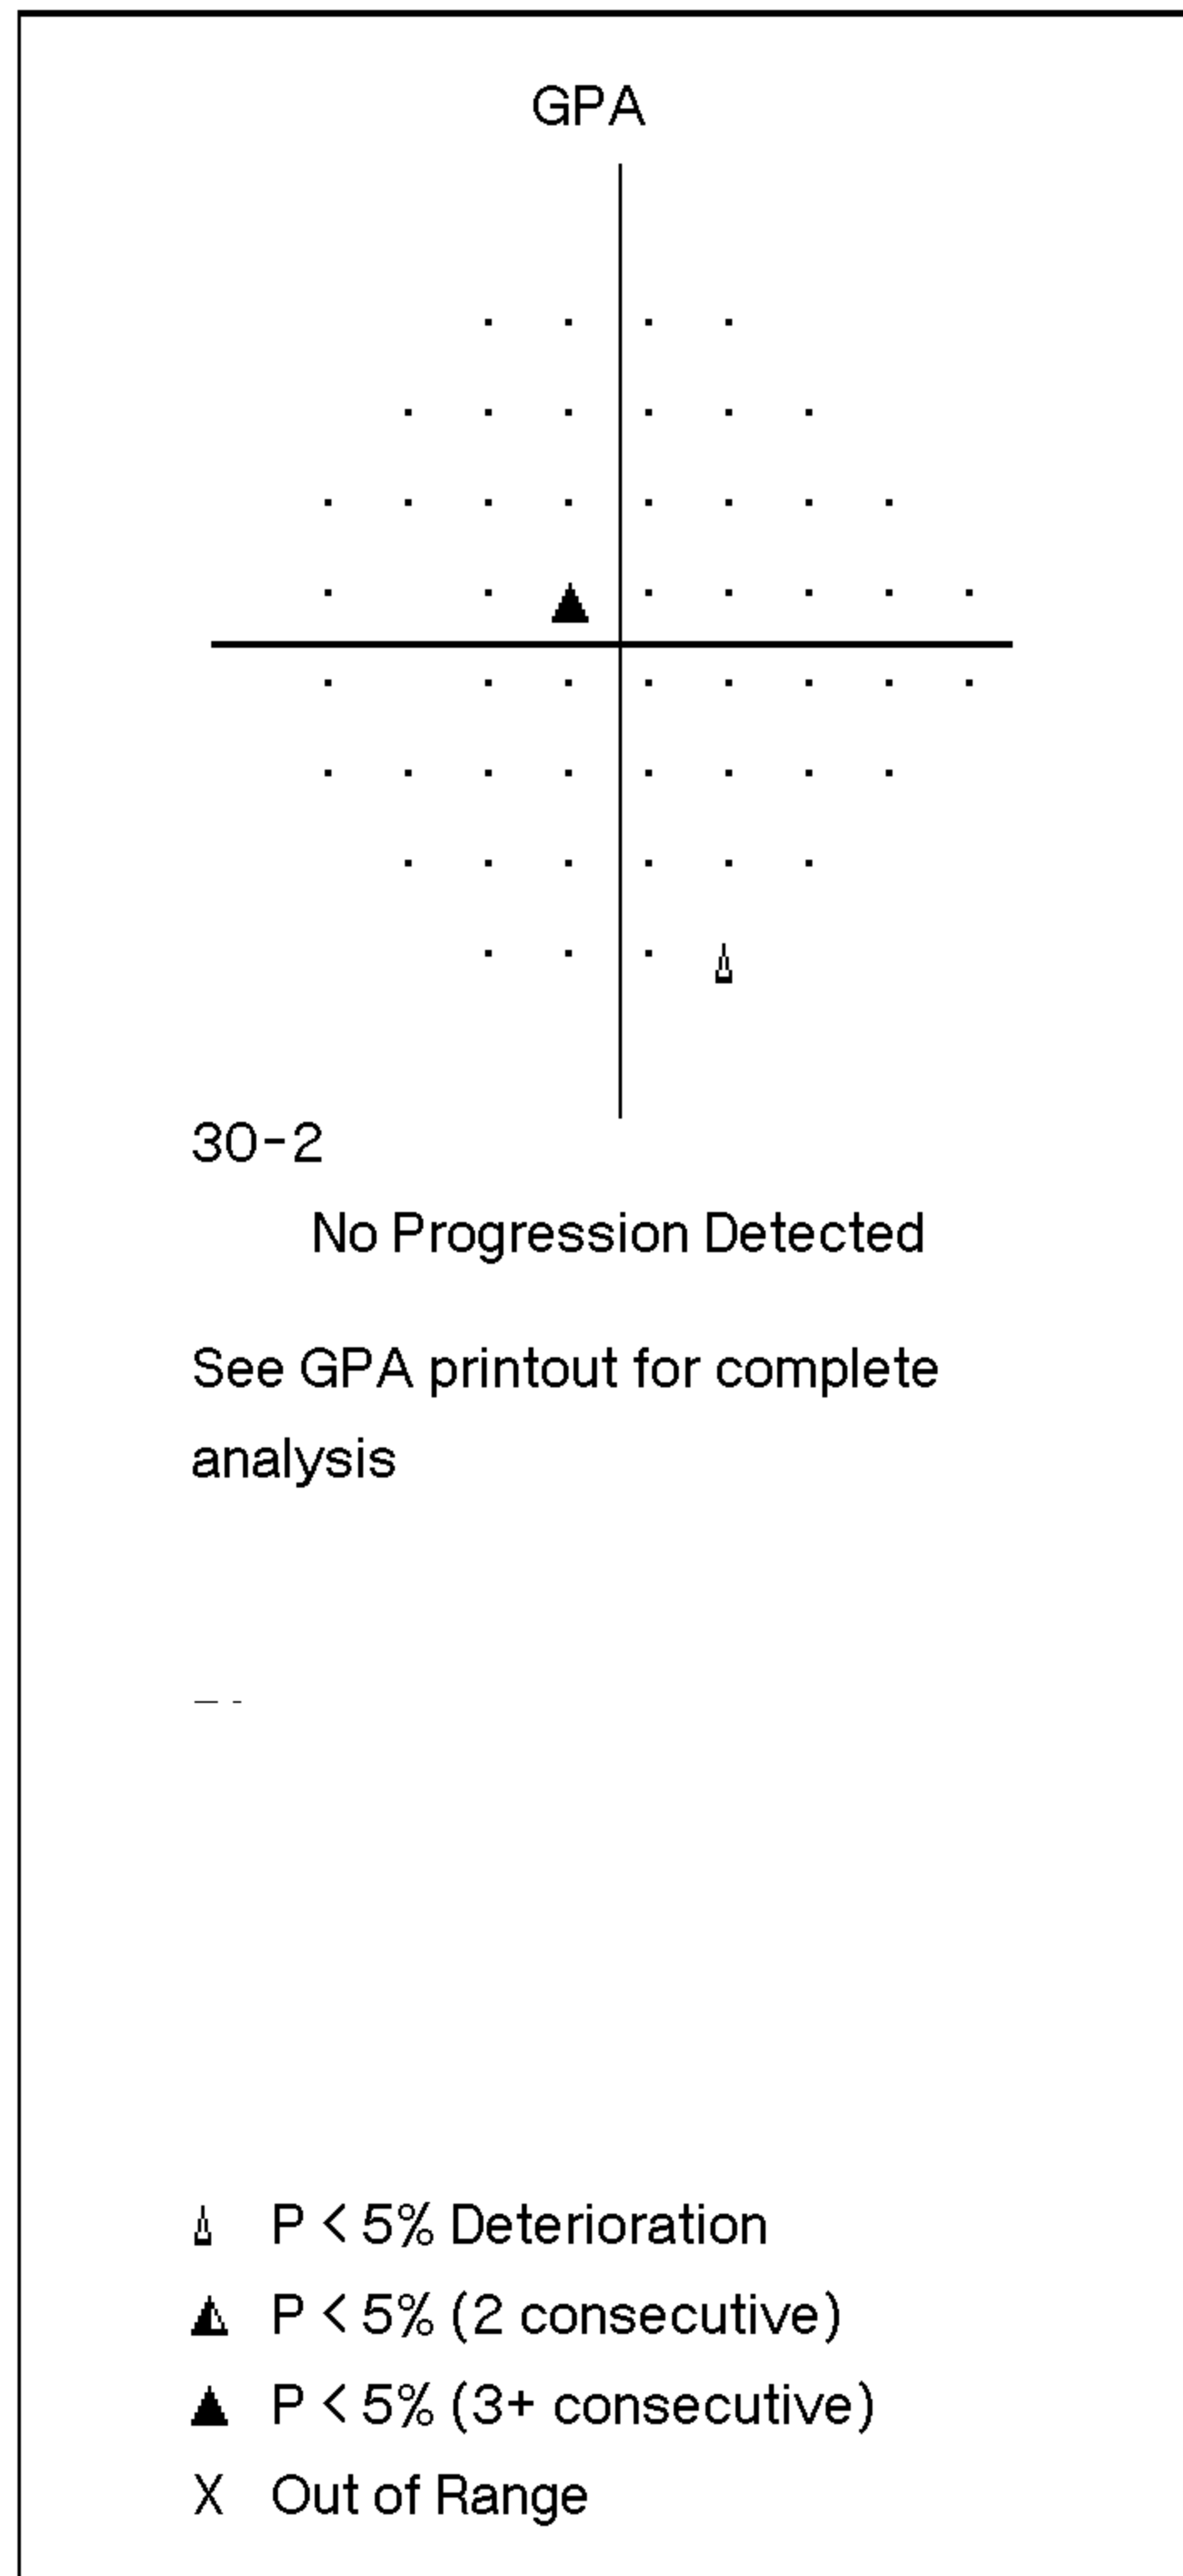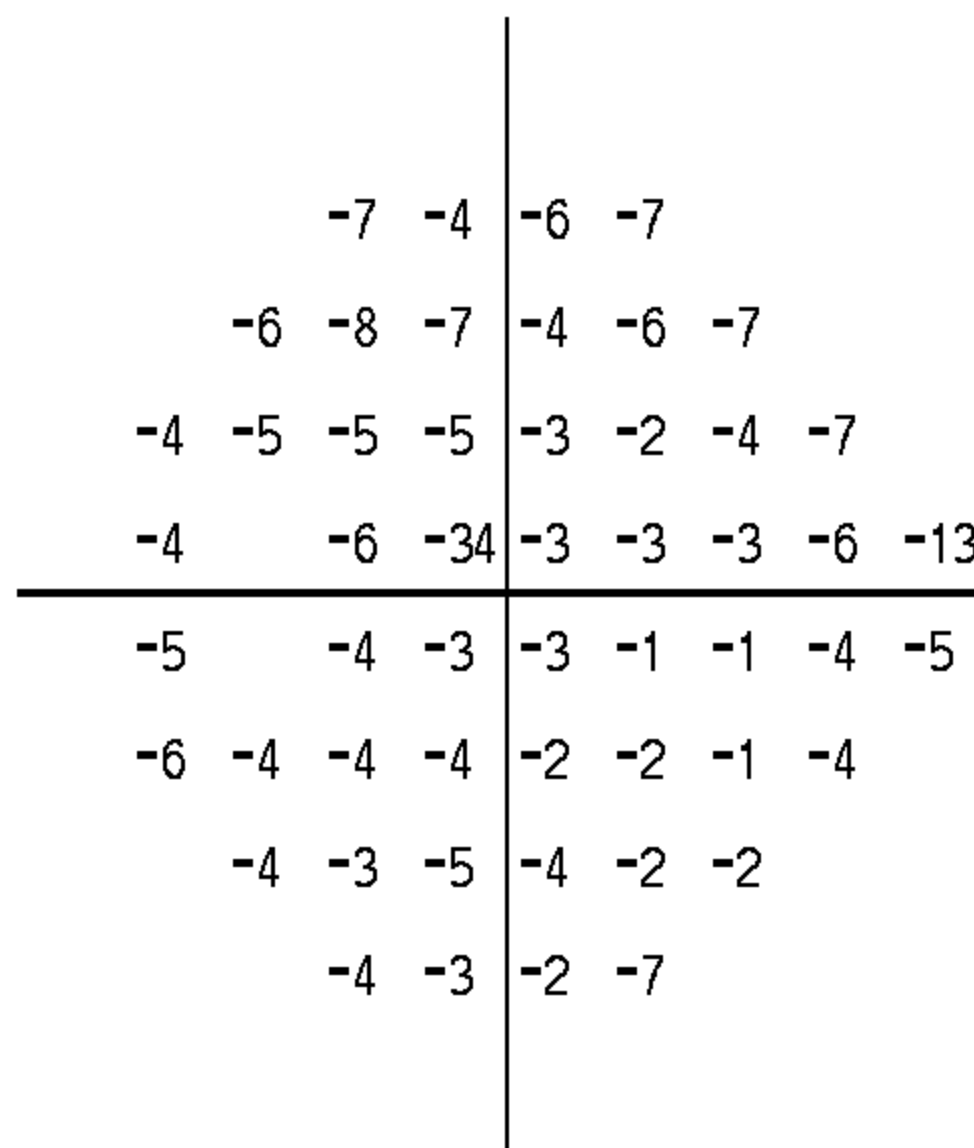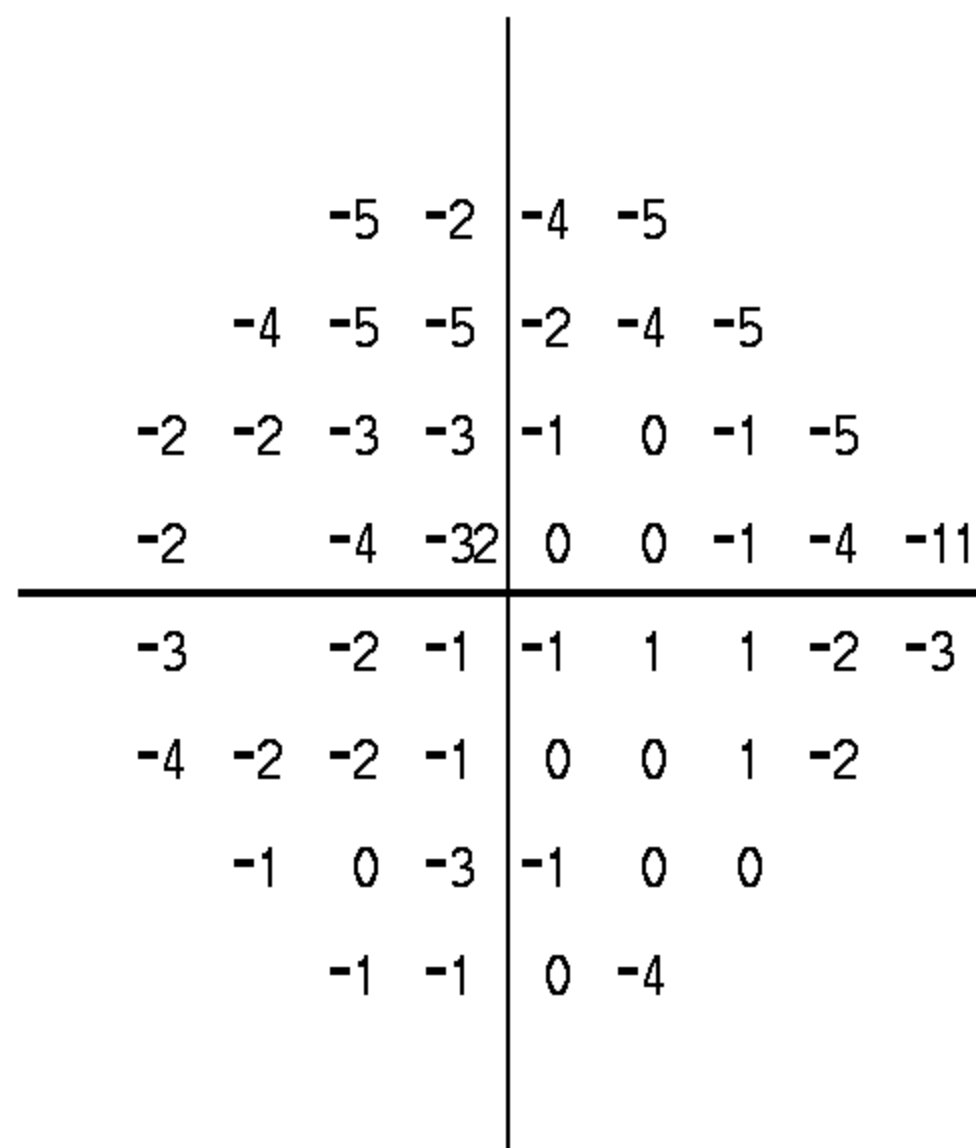

Total Deviation

Pattern Deviation

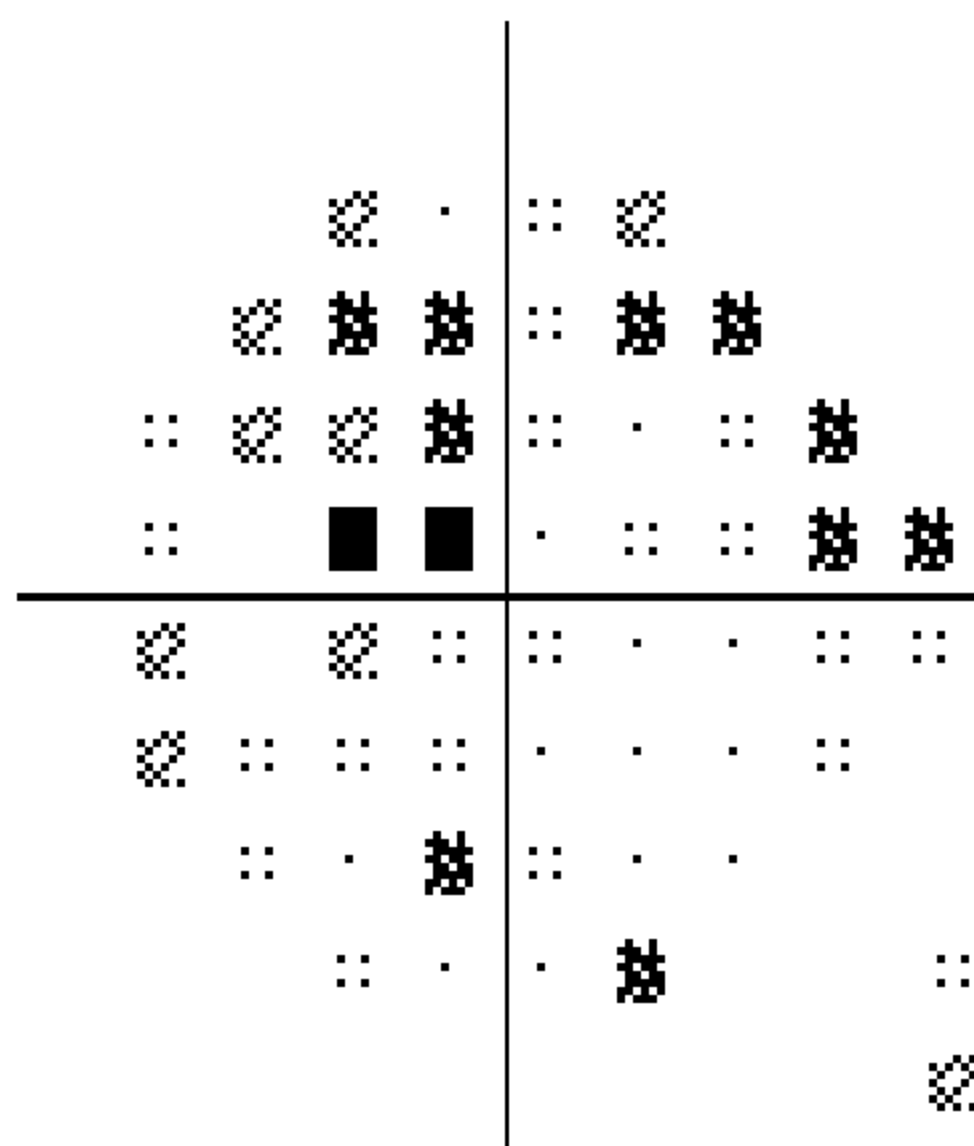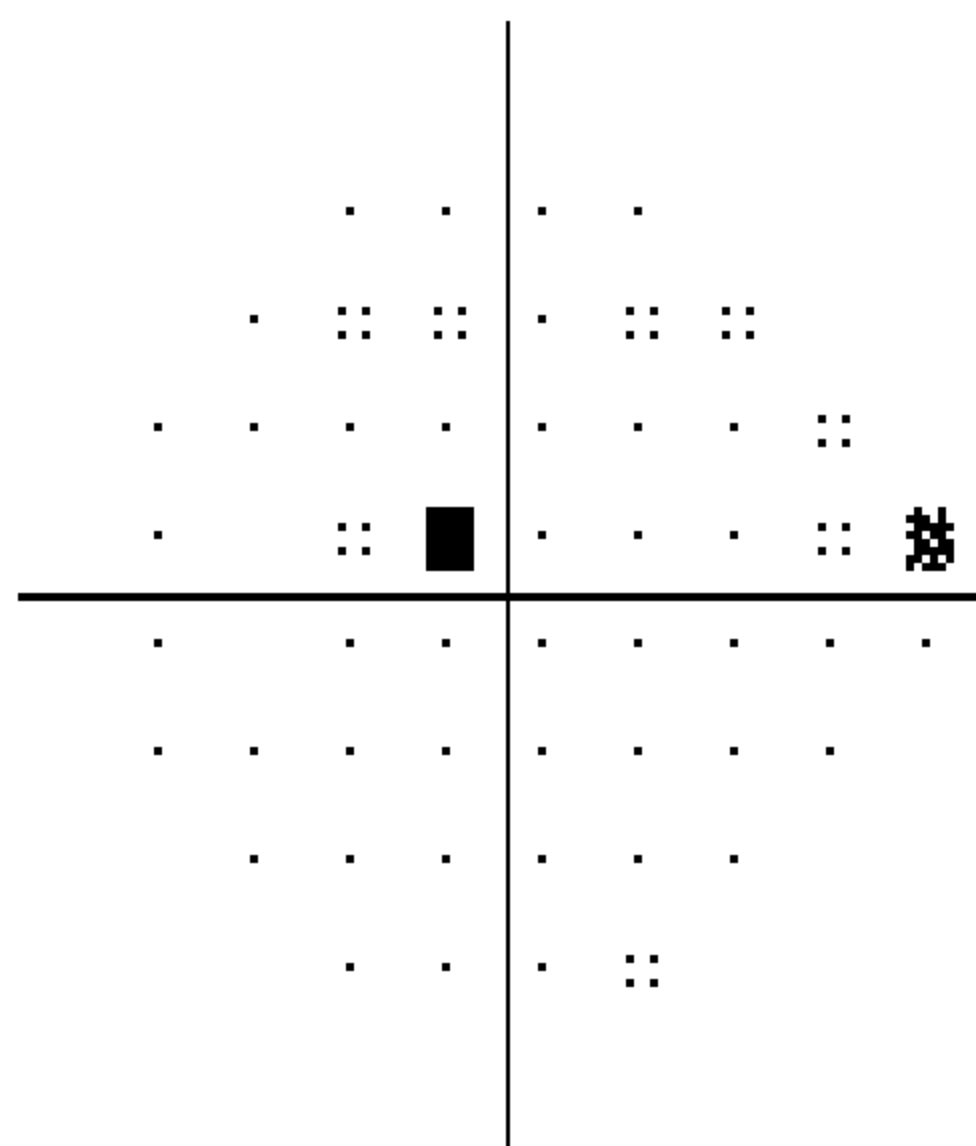

:: < 5%  
 ☒ < 2%  
 ☒ < 1%  
 ■ < 0.5%

INDIANA UNIVERSITY BCOR  
800 E ATWATER AVE  
BLOOMINGTON, IN 47405

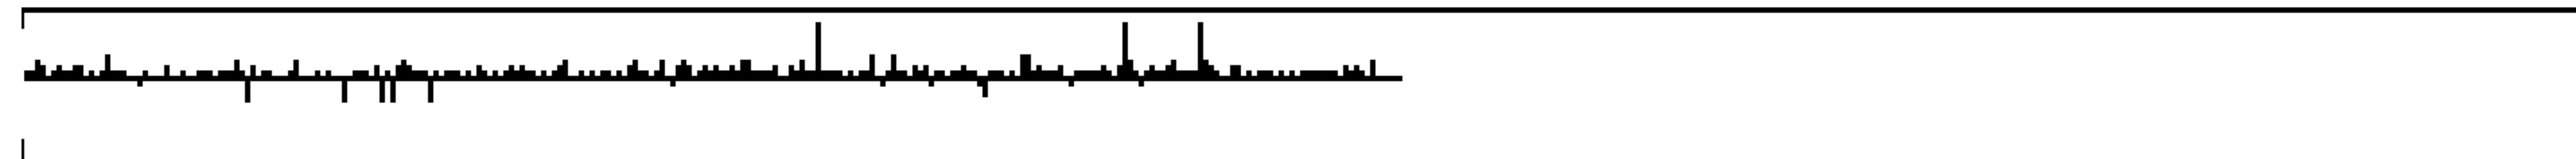

Supplement: OPO-38-164-s005.pdf [file OPO-38-164-s005.pdf]
