# Supplementary material for: A basis for customising perimetric locations within the macula in glaucoma
Source: PubMed Central journal article supplement — Ophthalmic Physiol Opt. 2018 Jan 8;38(2):164–73. doi: 10.1111/opo.12435 (PMC5887979; doi:10.1111/opo.12435), 2018-01-08

|       |      |
|-------|------|
| Name: | DOB: |
| ID:   |      |

### Central 24-2 Threshold Test

Fixation Monitor: Gaze/Blind Spot

Stimulus: III, White

Pupil Diameter: 3.2 mm

Date:

Fixation Target: Central

Background: 31.5 ASB

Visual Acuity:

Time:

Fixation Losses: 0/14

Strategy: SITA-Standard

RX: +0.00 DS DC X

Age:

False POS Errors: 1 %

False NEG Errors: 0 %

Test Duration: 04:58

Fovea: 36 dB

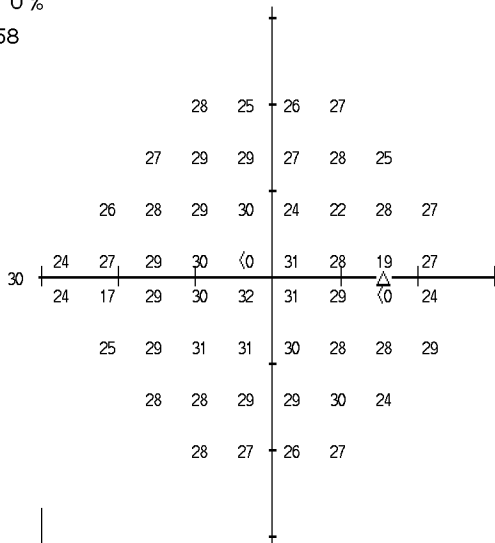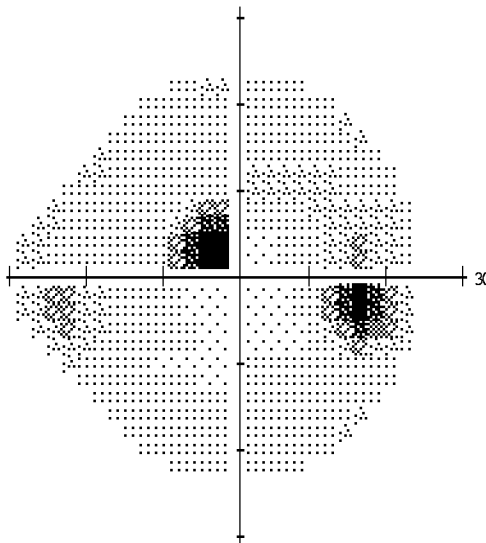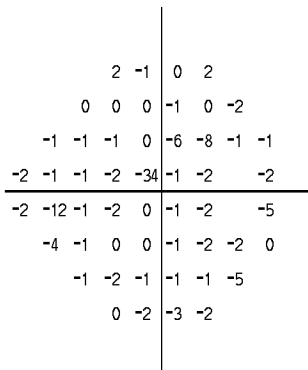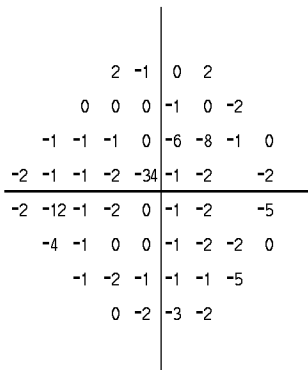

GHT  
Outside Normal Limits

VFI 92%

MD -2.56 dB P < 5%

PSD 6.06 dB P < 0.5%

Total Deviation

Pattern Deviation

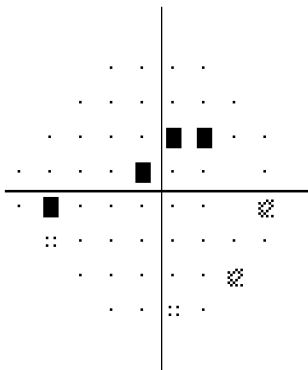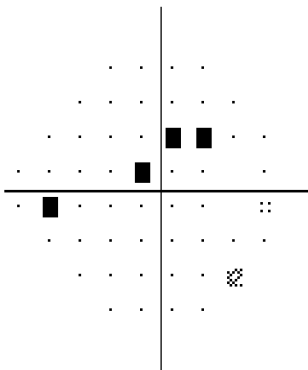

∴ < 5%  
 ⊠ < 2%  
 ⊞ < 1%  
 ■ < 0.5%

INDIANA UNIVERSITY BCOR  
 800 E ATWATER AVE  
 BLOOMINGTON, IN 47405

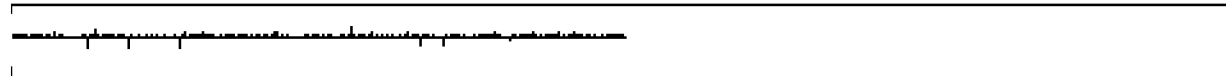

Supplement: OPO-38-164-s006.pdf [file OPO-38-164-s006.pdf]
