# Supplementary material for: A basis for customising perimetric locations within the macula in glaucoma
Source: PubMed Central journal article supplement — Ophthalmic Physiol Opt. 2018 Jan 8;38(2):164–73. doi: 10.1111/opo.12435 (PMC5887979; doi:10.1111/opo.12435), 2018-01-08
Supplement: OPO-38-164-s007.pdf [file OPO-38-164-s007.pdf]

|       |      |
|-------|------|
| Name: | DOB: |
| ID:   |      |

Central 24-2 Threshold Test

Fixation Monitor: Blind Spot  
 Fixation Target: Central  
 Fixation Losses: 1/16  
 False POS Errors: 0 %  
 False NEG Errors: 8 %  
 Test Duration: 05:48

Stimulus: III, White  
 Background: 31.5 ASB  
 Strategy: SITA-Standard

Pupil Diameter: 5.6 mm  
 Visual Acuity:  
 RX: +3.25 DS DC X

Date:  
 Time:  
 Age:

Fovea: 36 dB

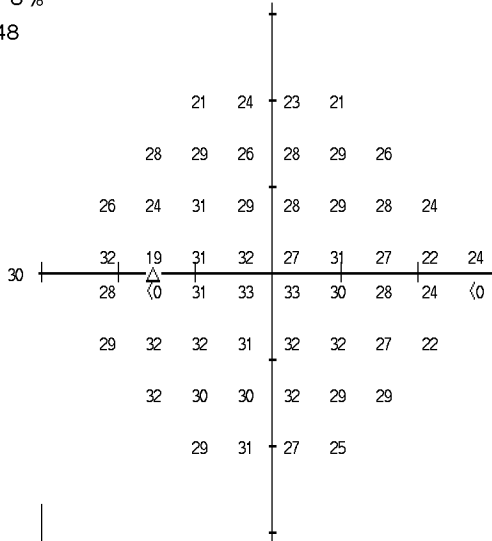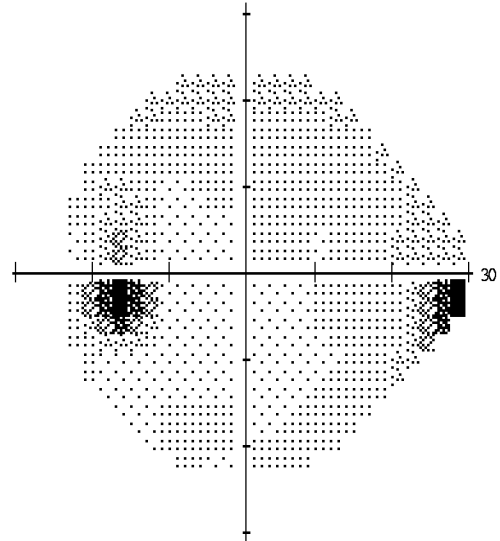

|    |    |    |    |    |    |    |     |
|----|----|----|----|----|----|----|-----|
| -5 | -2 | -4 | -5 |    |    |    |     |
| 1  | 0  | -3 | -1 | 0  | -2 |    |     |
| -2 | -5 | 1  | -1 | -3 | -1 | -2 | -4  |
| 3  | 0  | 1  | -5 | -1 | -3 | -7 | -2  |
| -2 | 0  | 1  | 0  | -2 | -3 | -5 | -28 |
| 0  | 2  | 1  | -1 | 1  | 0  | -3 | -6  |
| 2  | 0  | -1 | 1  | -1 | 0  |    |     |
| 0  | 1  | -2 | -3 |    |    |    |     |

|    |    |    |    |    |    |    |     |
|----|----|----|----|----|----|----|-----|
| -5 | -3 | -4 | -6 |    |    |    |     |
| 0  | 0  | -3 | -2 | -1 | -2 |    |     |
| -3 | -6 | 0  | -2 | -4 | -2 | -5 |     |
| 2  | -1 | 0  | -6 | -2 | -4 | -7 | -3  |
| -3 | -1 | 1  | 0  | -2 | -3 | -6 | -29 |
| -1 | 1  | 0  | -1 | 0  | -1 | -4 | -7  |
| 1  | -1 | -2 | 0  | -2 | -1 |    |     |
| -1 | 0  | -3 | -4 |    |    |    |     |

GHT  
 Outside Normal Limits  
  
 VFI 96%  
 MD -1.48 dB  
 PSD 3.43 dB P < 1%

Total Deviation

Pattern Deviation

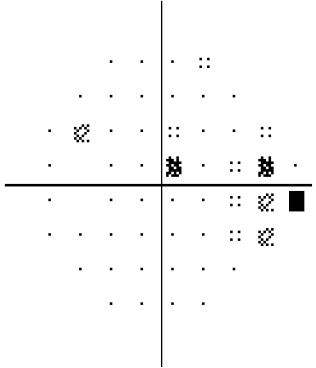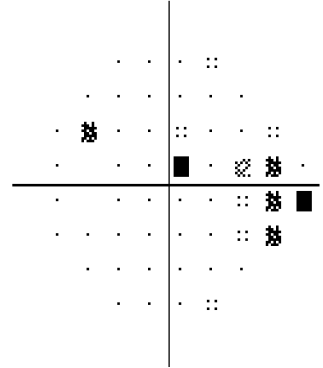

:: < 5%  
 ☒ < 2%  
 ☒ < 1%  
 ■ < 0.5%

INDIANA UNIVERSITY BCOR  
 800 E ATWATER AVE  
 BLOOMINGTON, IN 47405
