# Supplementary material for: A basis for customising perimetric locations within the macula in glaucoma
Source: PubMed Central journal article supplement — Ophthalmic Physiol Opt. 2018 Jan 8;38(2):164–73. doi: 10.1111/opo.12435 (PMC5887979; doi:10.1111/opo.12435), 2018-01-08

Single Field Analysis

Eye: Left

|       |      |
|-------|------|
| Name: | DOB: |
| ID:   |      |

Central 24-2 Threshold Test

Fixation Monitor: Gaze/Blind Spot  
 Fixation Target: Central  
 Fixation Losses: 0/17  
 False POS Errors: 1 %  
 False NEG Errors: 0 %  
 Test Duration: 06:34

Stimulus: III, White  
 Background: 31.5 ASB  
 Strategy: SITA-Standard

Pupil Diameter: 5.0 mm  
 Visual Acuity:  
 RX: +4.25 DS DC X

Date:  
 Time:  
 Age:

Fovea: 37 dB

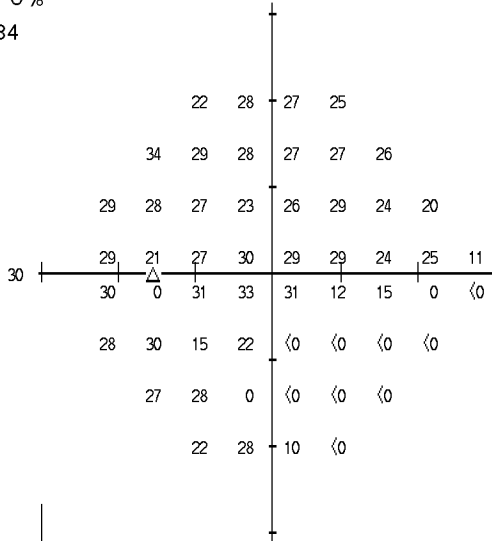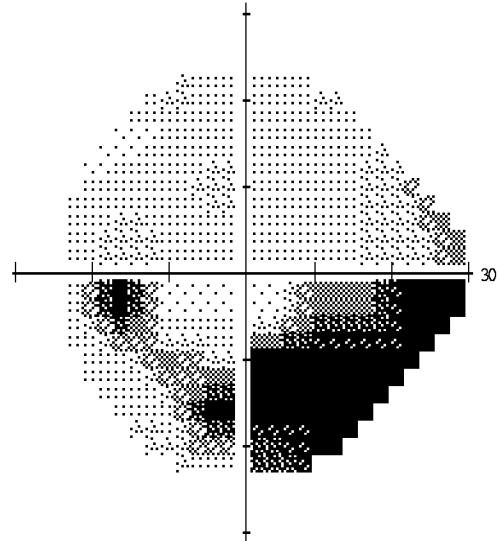

|    |    |     |     |     |     |     |     |
|----|----|-----|-----|-----|-----|-----|-----|
| -4 | 3  | 1   | -1  |     |     |     |     |
| 7  | 1  | -1  | -2  | -1  | -1  |     |     |
| 1  | 0  | -2  | -7  | -4  | -1  | -6  | -8  |
| 1  | -4 | -1  | -2  | -3  | -6  | -3  | -14 |
| 1  | 0  | 1   | -1  | -19 | -16 | -29 | -28 |
| -1 | 0  | -16 | -10 | -34 | -33 | -32 | -30 |
| -3 | -2 | -30 | -33 | -32 | -31 |     |     |
| -7 | -2 | -19 | -30 |     |     |     |     |

|    |    |     |     |     |     |     |     |
|----|----|-----|-----|-----|-----|-----|-----|
| -4 | 2  | 0   | -2  |     |     |     |     |
| 6  | 0  | -1  | -3  | -2  | -2  |     |     |
| 1  | -1 | -3  | -8  | -5  | -2  | -6  | -9  |
| 0  | -4 | -2  | -3  | -3  | -7  | -4  | -15 |
| 0  | -1 | 1   | -2  | -20 | -17 | -30 | -29 |
| -1 | 0  | -17 | -10 | -34 | -34 | -33 | -31 |
| -3 | -3 | -31 | -33 | -33 | -32 |     |     |
| -7 | -2 | -20 | -31 |     |     |     |     |

GHT  
 Outside Normal Limits  
  
 VFI 76%  
 MD -10.65 dB P < 0.5%  
 PSD 13.58 dB P < 0.5%

Total Deviation

Pattern Deviation

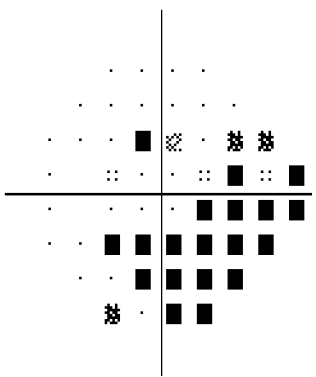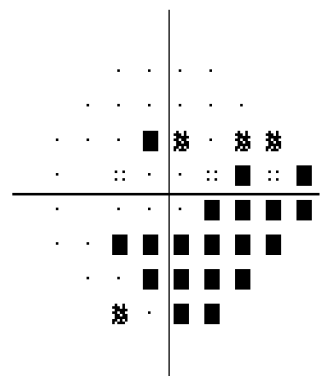

∴ < 5%  
 ☒ < 2%  
 ☒ < 1%  
 ■ < 0.5%

INDIANA UNIVERSITY BCOR  
 800 E ATWATER AVE  
 BLOOMINGTON, IN 47405

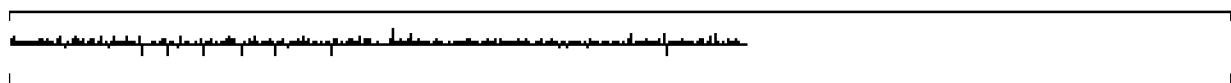

Supplement: OPO-38-164-s009.pdf [file OPO-38-164-s009.pdf]
