# Supplementary material for: A basis for customising perimetric locations within the macula in glaucoma
Source: PubMed Central journal article supplement — Ophthalmic Physiol Opt. 2018 Jan 8;38(2):164–73. doi: 10.1111/opo.12435 (PMC5887979; doi:10.1111/opo.12435), 2018-01-08

|       |      |
|-------|------|
| Name: | DOB: |
| ID:   |      |

### Central 24-2 Threshold Test

Fixation Monitor: Gaze/Blind Spot  
 Fixation Target: Central  
 Fixation Losses: 2/16  
 False POS Errors: 3 %  
 False NEG Errors: 5 %  
 Test Duration: 06:45

Stimulus: III, White  
 Background: 31.5 ASB  
 Strategy: SITA-Standard

Pupil Diameter: 5.2 mm  
 Visual Acuity:  
 RX: +3.00 DS DC X

Date:  
 Time:  
 Age:

Fovea: 36 dB

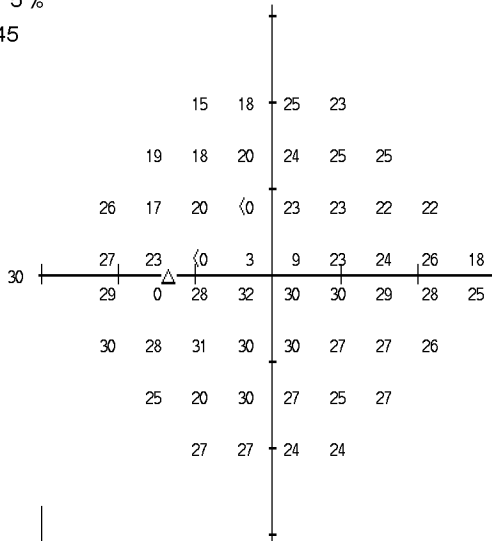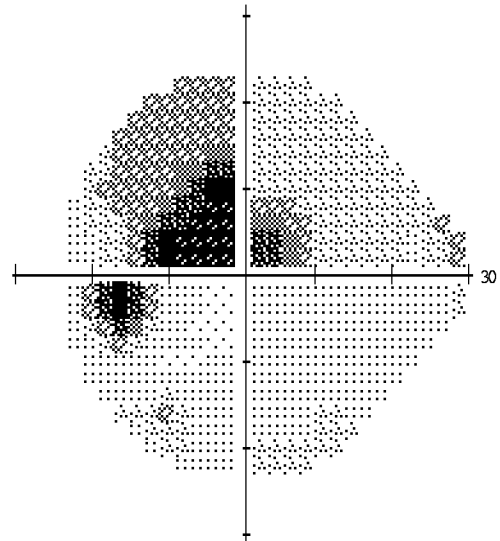

|     |     |     |     |    |    |    |    |
|-----|-----|-----|-----|----|----|----|----|
| -10 | -8  | 0   | -3  |    |    |    |    |
| -8  | -9  | -8  | -5  | -3 | -3 |    |    |
| -2  | -11 | -9  | -32 | -7 | -7 | -7 | -6 |
| -2  | -32 | -28 | -22 | -8 | -6 | -3 | -7 |
| 0   | -3  | 0   | -1  | -2 | -1 | -1 | 0  |
| 1   | -2  | 0   | -1  | -2 | -4 | -3 | -2 |
| -4  | -10 | -1  | -3  | -5 | -2 |    |    |
| -2  | -2  | -5  | -4  |    |    |    |    |

|    |     |     |     |    |    |    |    |
|----|-----|-----|-----|----|----|----|----|
| -9 | -7  | 0   | -2  |    |    |    |    |
| -7 | -8  | -7  | -4  | -2 | -2 |    |    |
| -1 | -11 | -9  | -31 | -6 | -7 | -6 | -5 |
| -1 | -32 | -28 | -21 | -8 | -6 | -2 | -7 |
| 1  | -2  | 1   | -1  | -1 | -1 | 0  | 0  |
| 2  | -1  | 1   | 0   | -1 | -4 | -2 | -1 |
| -4 | -9  | 0   | -3  | -5 | -1 |    |    |
| -1 | -1  | -5  | -3  |    |    |    |    |

GHT  
 Outside Normal Limits

VFI 77%  
 MD -6.16 dB P < 0.5%  
 PSD 8.58 dB P < 0.5%

Total Deviation

Pattern Deviation

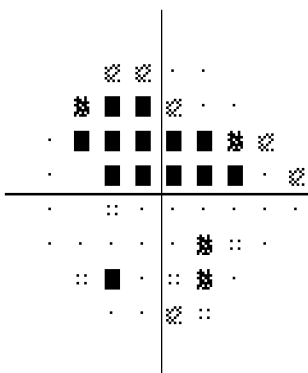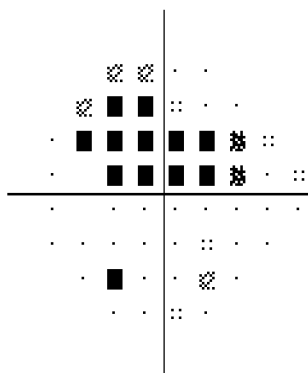

□ < 5%  
 ⊠ < 2%  
 ■ < 1%  
 ■ < 0.5%

INDIANA UNIVERSITY BCOR  
 800 E ATWATER AVE  
 BLOOMINGTON, IN 47405

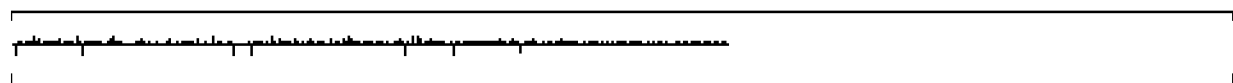

Supplement: OPO-38-164-s010.pdf [file OPO-38-164-s010.pdf]
